# Supplementary material for: Mitigation of RuO6 octahedron distortion by enhanced A-site electronegativity in pyrochlore for acidic water oxidation
Source: Royal Society of Chemistry journal article supplement (doi:10.1039/d2ta00966h), 2022-01-01
Supplement: d2ta00966h1.pdf [file d2ta00966h1.pdf]

## Supporting Information

### **Mitigation of RuO<sub>6</sub> Octahedron Distortion by Enhanced A-site**

### **Electronegativity in Pyrochlore for Acidic Water Oxidation**

Jiabiao Yan<sup>a, +</sup>, Jing Zhu<sup>c, +</sup>, Dawei Chen<sup>a, \*</sup>, Shuai Liu<sup>d</sup>, Xu Zhang<sup>a</sup>, Shoushan Yu<sup>a, \*</sup>, Zhenhua Zeng<sup>b, \*</sup>,  
Luhua Jiang<sup>a, \*</sup>, Fanglin Du<sup>a</sup>

a. College of Material Science and Engineering, Qingdao University of Science and Technology, Zhengzhou Road 53, Qingdao, 266042, China. E-mail: D. Chen (daweichen@qust.edu.cn), L. Jiang (luhuajiang@qust.edu.cn), S. Yu (shoushanyu@qust.edu.cn)

b. Davidson School of Chemical Engineering, Purdue University, West Lafayette, IN 47907, USA. E-mail: Z. Zeng (zeng46@purdue.edu)

c. Department of Chemical Physics, School of Chemistry and Materials Science, University of Science and Technology of China, Hefei 230026, Anhui, China.

d. School of Mechatronics and Energy Engineering, Ningbo Institute of Technology, Zhejiang University, Ningbo, 315100, China.

## Electrochemical Measurements.

In order to calculate the geometric current density ( $j_{geo}$ ), the current was normalized by the geometric area of GCE according to the Equation 1:

$$j_{geo} = \frac{i \times 1000}{S} \quad (\text{mA/cm}^2) \quad (1)$$

where  $i$  (A) is the current compensated by 95% iR-drop, and  $S$  is the geometric area of GCE (0.19625 cm<sup>2</sup>).

In order to calculate the ruthenium mass activity ( $j_{Ru}$ ), the current was normalized by the mass of ruthenium according to the Equation 2:

$$j_{Ru} = \frac{i \times 1000}{S \times m_{loading} \times W_{Ru}} \quad (\text{A/g}_{Ru}) \quad (2)$$

where  $i$  (A) is the current compensated by 95% iR-drop,  $S$  is the geometric area of GCE (0.19625 cm<sup>2</sup>),  $W_{Ru}$  is weight percent of Ru(wt.%) in the catalyst, and  $m_{loading}$  is the loading of catalyst on GCE (0.2 mg cm<sup>-2</sup>).

ECSA was calculated by the cyclic voltammetry curves with different scanning rates (10, 20, 30, 40, and 50 mV s<sup>-1</sup>, respectively). The non-Faradaic current measured was plotted as a function of scan rate to obtain the capacitances ( $C_{dl}$ ). Then, the ECSA was calculated according to the Equation 3:

$$ECSA = \frac{C_{dl} \times S}{C_s} \quad (\text{cm}^2) \quad (3)$$

where  $C_{dl}$  is the capacitance for each samples,  $S$  is the geometric area of GCE (0.19625 cm<sup>2</sup>), the value of specific capacitance ( $C_s$ ) is 0.035 mF/cm<sup>2</sup> in this work and  $C_{dl}/C_s$  is the roughness factor (RF).

Finally, the OER polarization curves was normalized by ECSA according to the Equation 4:

$$j_{ECSA} = \frac{i \times 1000}{ECSA} \quad (\text{mA/cm}^2) \quad (4)$$

where  $i$  (A) is the current compensated by 95% iR-drop, and ECSA is the electrochemical active surface area (cm<sup>2</sup>) calculated according to the Equation (3).

Polarization curves normalized by BET area ( $j_{BET}$ ) was obtained according to the Equation (5):

$$j_{BET} = \frac{i \times 1000}{S \times BETarea \times m_{loading}} \quad (\text{mA/cm}^2) \quad (5)$$

where  $i$  (A) is the current compensated by 95% iR-drop,  $S$  is the geometric area of GCE (0.19625 cm<sup>2</sup>),  $BETarea$  is calculated by the Nitrogen absorption-desorption isotherms, and  $m_{loading}$  is the loading of catalyst on GCE (0.2 mg cm<sup>-2</sup>).

In order to calculate the turnover frequencies (TOFs), we make the following settings. Firstly, assuming each ruthenium atoms in the catalysts formed one active center. The numbers of Ru atoms number in catalysts were calculated from the weight percent of Ru and the mass loading on the glass carbon electrode according to the equation (6):

$$N_{Ru} = \frac{m_{loading} \times S \times W_{Ru}}{M_{Ru} \times 1000} \times N_A \quad (6)$$

where  $m_{loading}$  is loading of catalyst (0.2 mg cm<sup>-2</sup>),  $S$  is the geometric area of GCE (0.19625 cm<sup>2</sup>),  $W_{Ru}$  is weight percent of Ru (wt.%) in the catalyst,  $M_{Ru}$  is the molar mass of Ru, and  $N_A$  is the Avogadro constant ( $6.02 \times 10^{23}$  mol<sup>-1</sup>).

The number of total O<sub>2</sub> turnovers per second ( $N_{O_2}/s$ ) was calculated from the current density ( $j_{geo}$ ) according to the Equation (7):

$$N_{O_2}/s = \frac{j_{geo} \times S}{4e \times 1000} \quad (\text{s}^{-1}) \quad (7)$$

where  $j_{geo}$  (mA/cm<sup>2</sup>) is the current density normalized by geometric area,  $S$  is the geometric area of GCE (0.19625 cm<sup>2</sup>), the number of 4 means 4 electrons transfer in OER, and  $e$  is the charge of electron ( $1.6 \times 10^{-19}$  C).

Thus, the TOF value underestimated was calculated according to the equation (8), assuming the Faraday efficiency of the reaction process is 100%.

$$TOF(O_2) = \frac{N_{O_2}/s}{N_{Ru}} = \frac{j_{geo} \times M_{Ru}}{m_{loading} \times W_{Ru} \times 4F} \quad (\text{s}^{-1}) \quad (8)$$

where  $j_{\text{geo}}$  ( $\text{mA}/\text{cm}^2$ ) is the current density normalized by geometric area,  $M_{\text{Ru}}$  is the molar mass of Ru,  $m_{\text{loading}}$  is the loading of catalyst on GCE ( $0.2 \text{ mg cm}^{-2}$ ),  $W_{\text{Ru}}$  is weight percent of Ru (wt.%) in the catalyst, the number of 4 means 4 electrons transfer in OER, and F is Faraday constant ( $96485 \text{ C mol}^{-1}$ ).

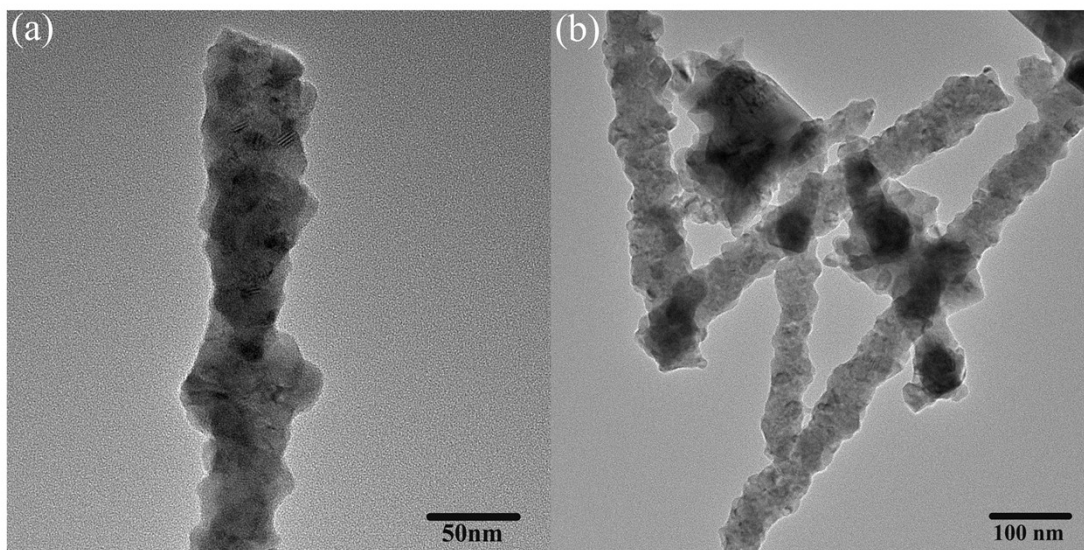

**Fig. S1.** Transmission electron microscopy (TEM) images of YRO.

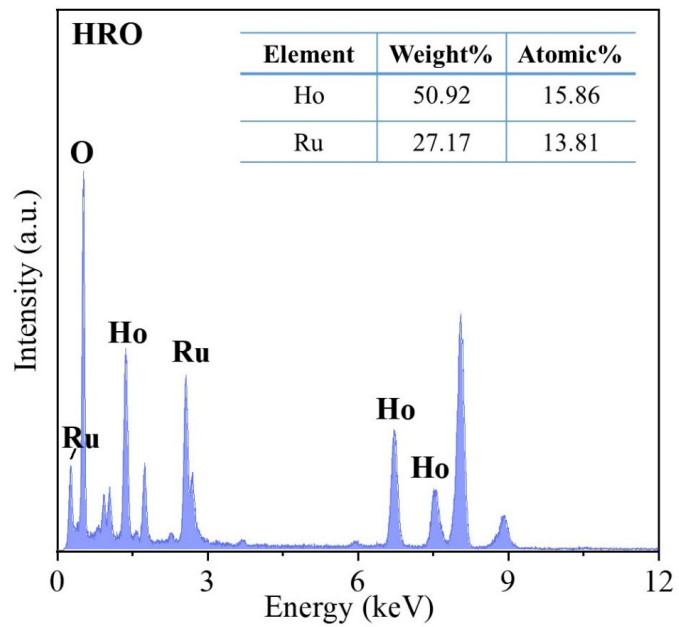

**Fig. S2.** Transmission electron microscopy with energy dispersive X-Ray spectroscopy (TEM-EDX) image of HRO.

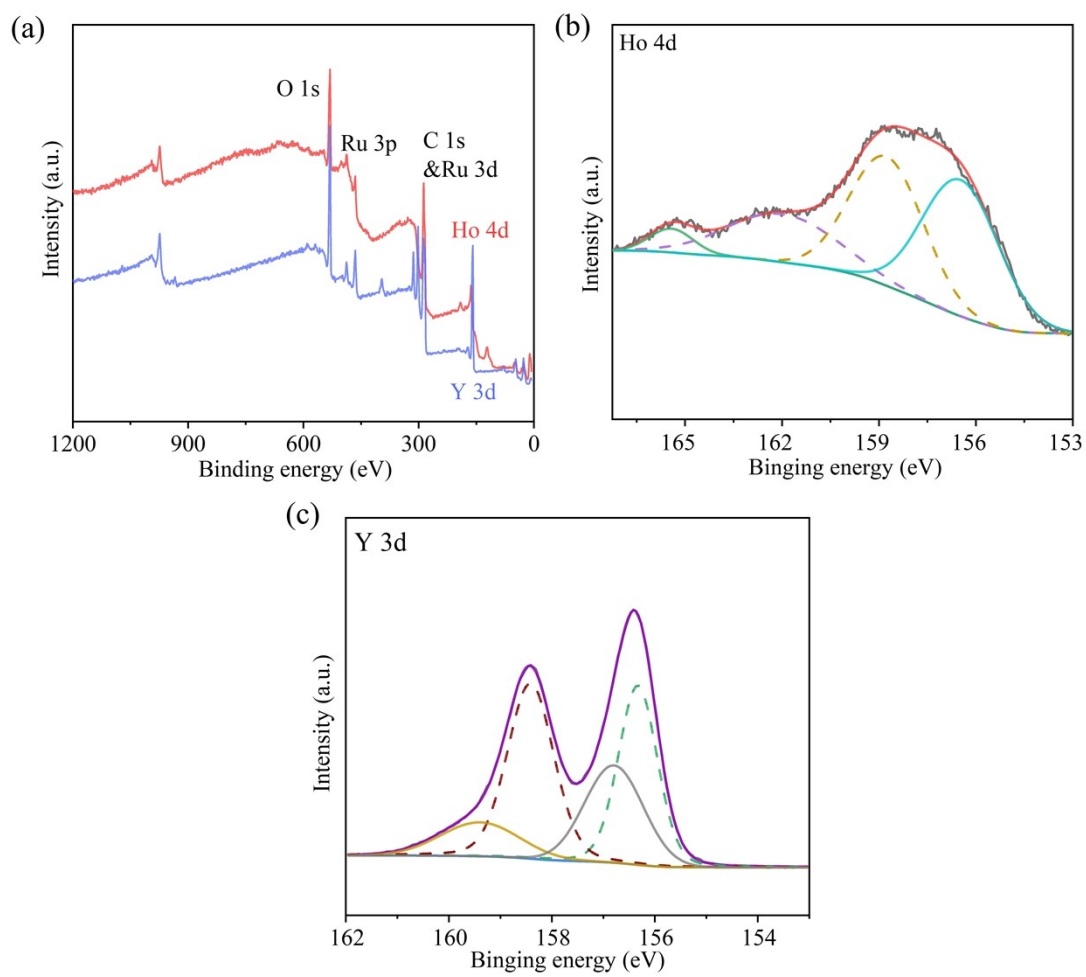

**Fig. S3.** (a) the wide XPS spectra for HRO and YRO; (b) the XPS spectra of Ho 4d for HRO; (c) the XPS spectra of Y 3d for YRO.

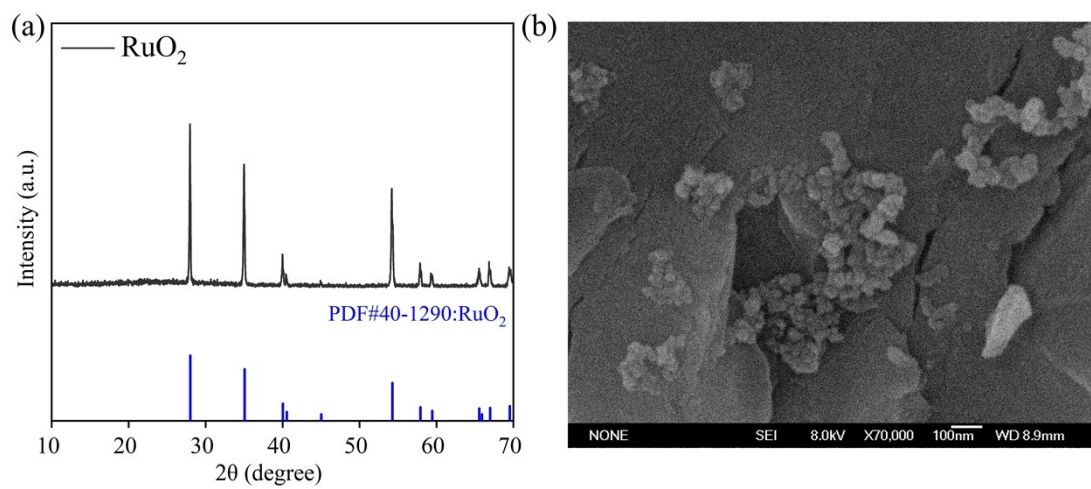

**Fig. S4.** (a) X-ray diffraction (XRD) and (b) Scanning electron microscope (SEM) images of RuO<sub>2</sub>.

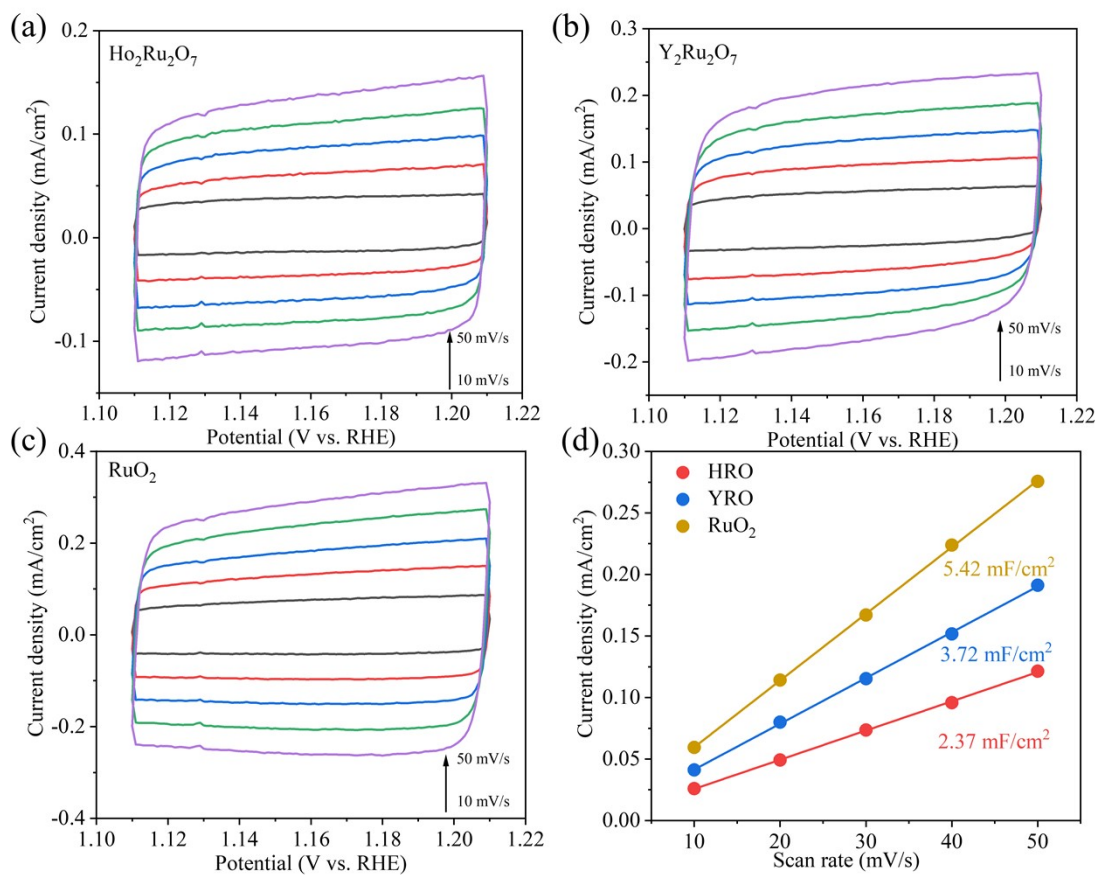

**Fig. S5.** (a-c) CV scanning curves in 0.1 M  $\text{HClO}_4$  electrolyte at different scan rates in non-Faradaic potential region for HRO, YRO and  $\text{RuO}_2$ , respectively; (d) Double-layer capacitances of various catalysts.

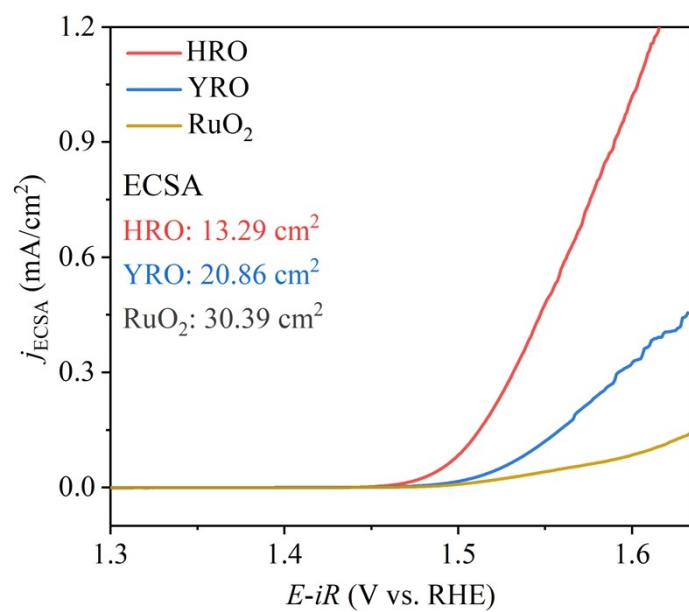

**Fig. S6.** LSV polarization curves normalized by ECSA.



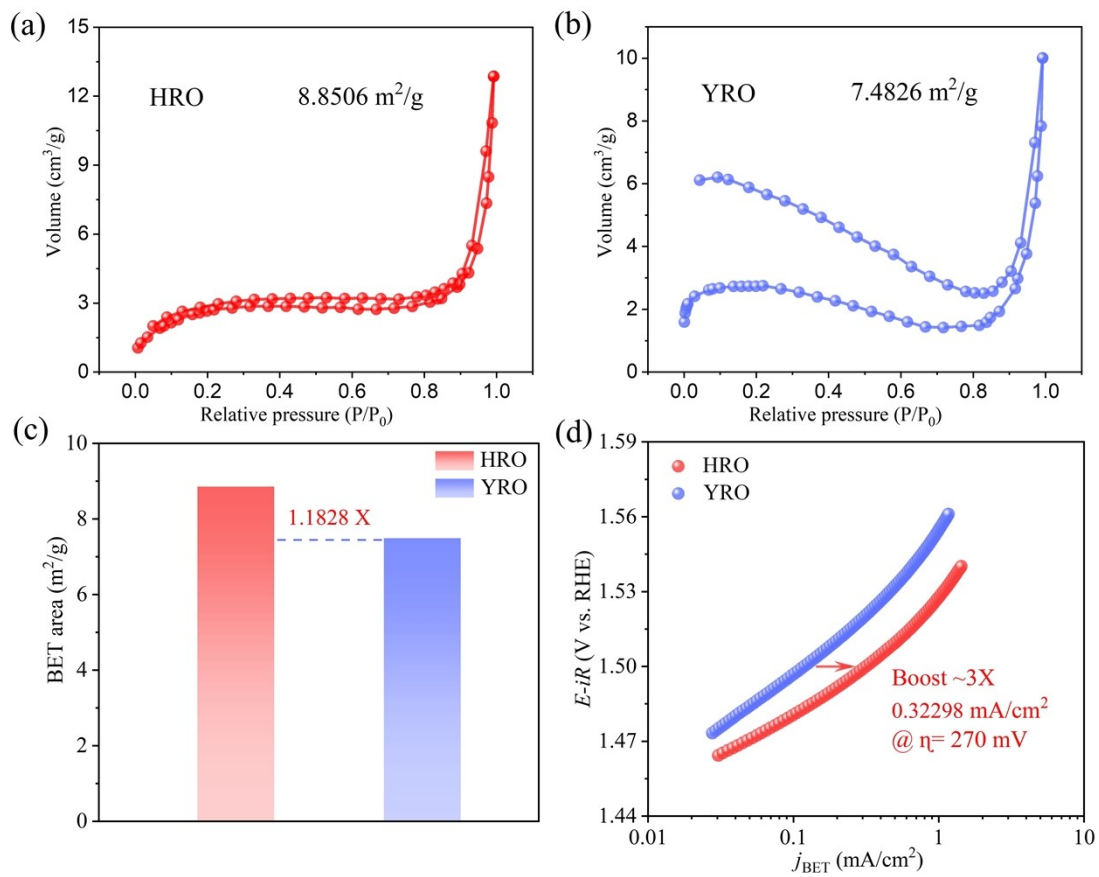

**Fig. S7.** Nitrogen adsorption-desorption isotherms with the corresponding Brunauer-Emmett-Teller (BET) surface area for (a) HRO and (b) YRO; (c) the comparison of BET area for HRO and YRO; (d) polarization curves normalized by BET area.

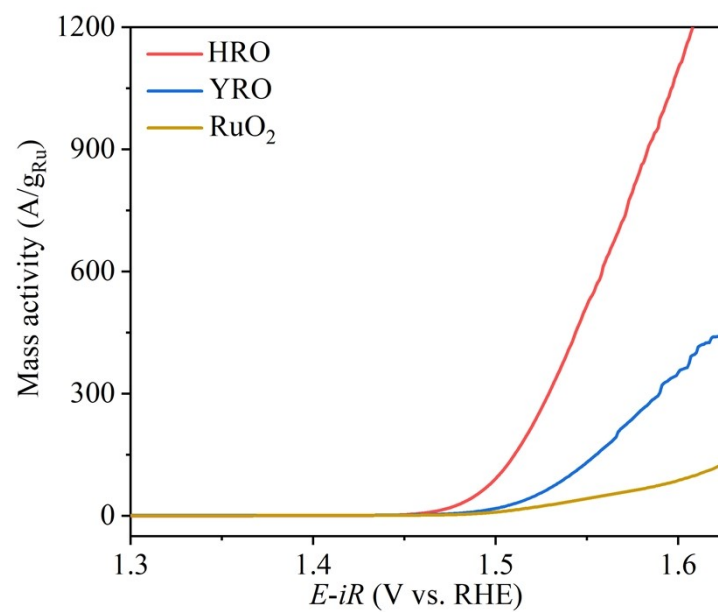

**Fig. S8.** LSV polarization curves normalized by the mass of ruthenium in catalyst.

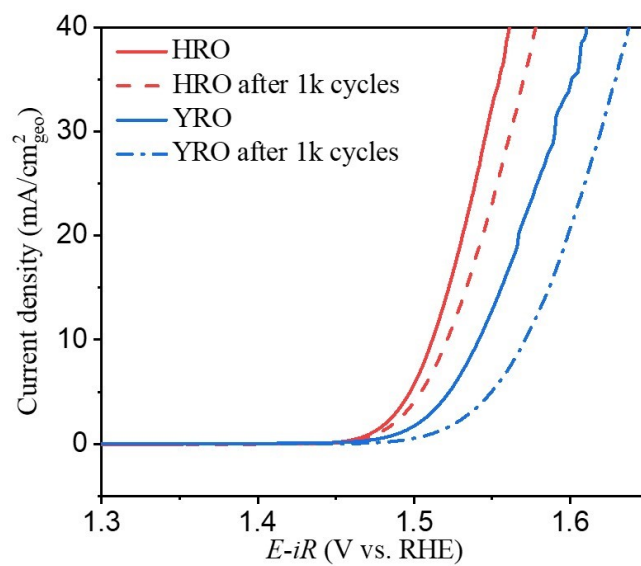

**Fig. S9.** LSV curves measured before and after 1000 CV cycles for HRO and YRO.

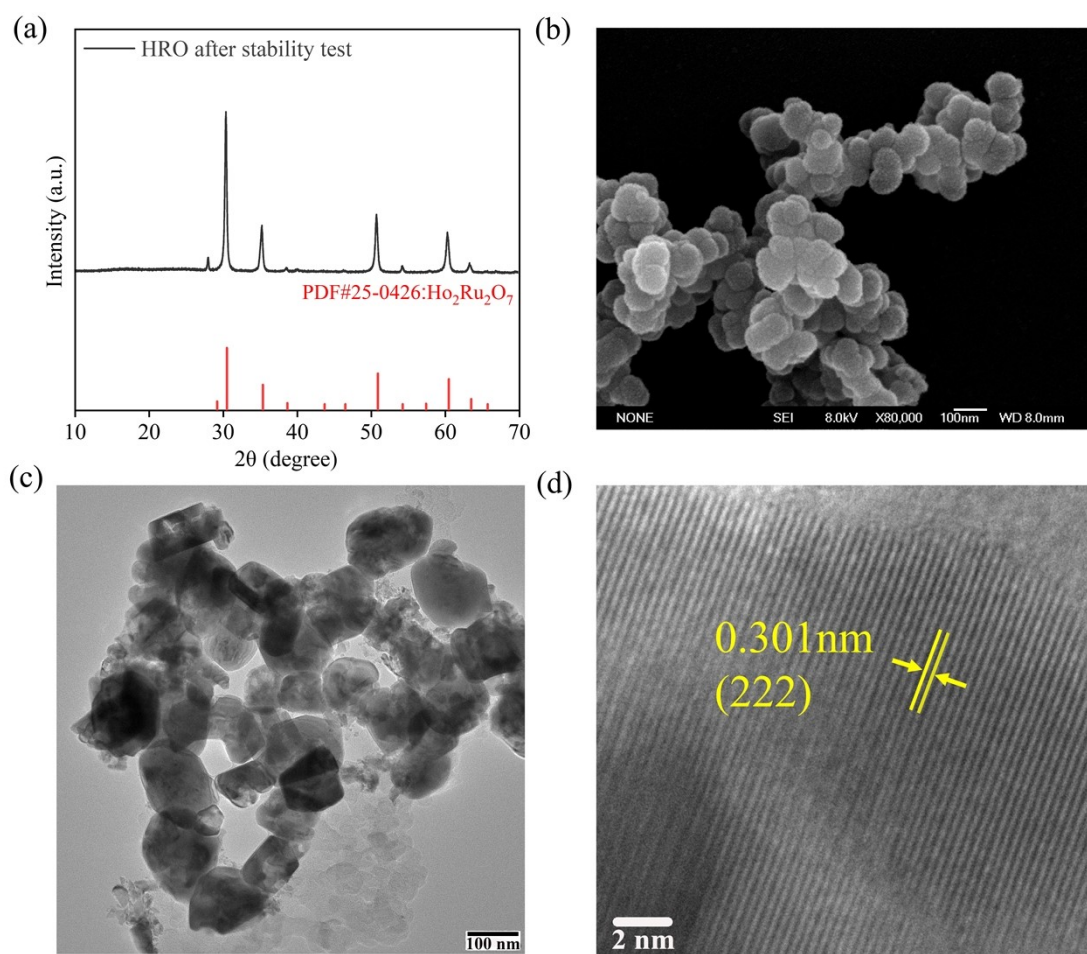

**Fig. S10.** Physical characterization for HRO after stability test. (a) XRD pattern; (b) SEM image; (c) TEM image; (d) HRTEM image.

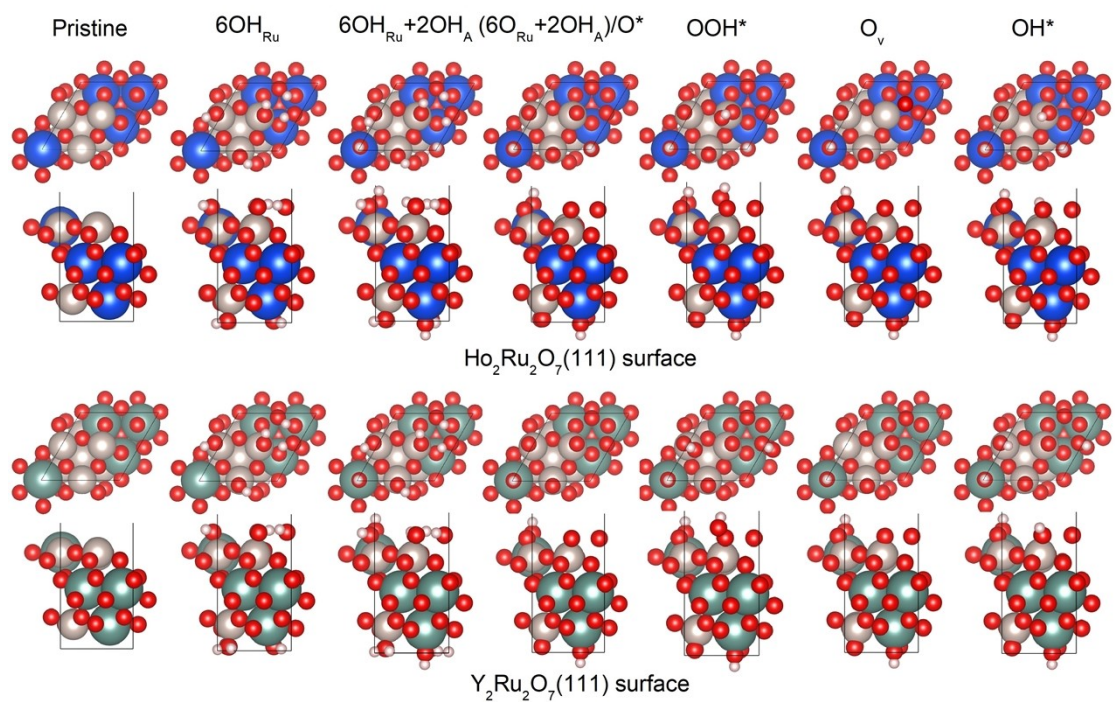

**Fig. S11.** The OER mechanism on the HRO (111) and YRO (111) surfaces.

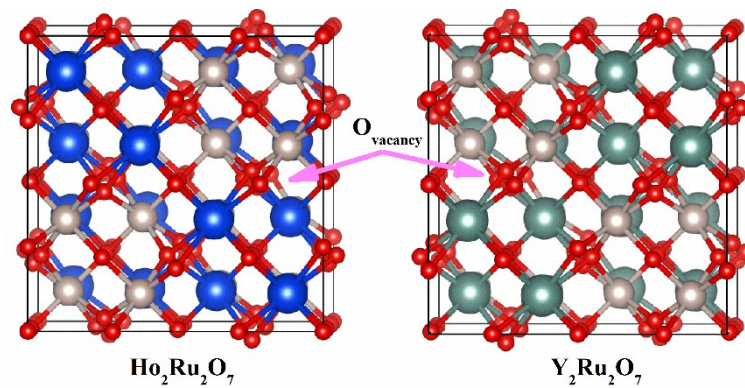

**Fig. S12.** The configurations of  $\text{Ho}_2\text{Ru}_2\text{O}_7$  and  $\text{Y}_2\text{Ru}_2\text{O}_7$ , and the potential O vacancy positions in bulk structures for the formation energy of oxygen vacancy calculation.

**Table S1.** Detailed comparison information of electronegativity and radii for trivalent Ho and Y cations.<sup>1,2</sup>

| CN | Electronegativity |       | Crystal Radius |       | Ionic Radius |       |
|----|-------------------|-------|----------------|-------|--------------|-------|
|    | HRO               | YRO   | HRO            | YRO   | HRO          | YRO   |
| 6  | 1.433             | 1.340 | 1.041          | 1.040 | 0.901        | 0.900 |
| 7  | 1.403             | 1.314 | --             | 1.100 | --           | 0.960 |
| 8  | 1.377             | 1.291 | 1.155          | 1.159 | 1.015        | 1.019 |
| 9  | 1.353             | 1.272 | 1.216          | 1.215 | 1.072        | 1.175 |
| 10 | 1.334             | --    | 1.260          | --    | 1.120        | --    |

**Table S2.** ICP analysis for HRO.

| Element | Sample amount | Conversion content | Wt.%   |
|---------|---------------|--------------------|--------|
| Ho      | 9.5 mg        | 200526.3 mg/kg     | 20.05% |
| Ru      | 9.5 mg        | 111842.1 mg/kg     | 11.18% |

**Table S3.** The ratio of all peaks in O 1s spectrum

|     |       | O <sub>L</sub> | O <sub>sur</sub> | O <sub>V</sub> | O <sub>adv</sub> | O <sub>V</sub> /O <sub>L</sub> |
|-----|-------|----------------|------------------|----------------|------------------|--------------------------------|
| HRO | area  | 69076.1        | 32539.1          | 35486.6        | 22944.3          | 0.51                           |
|     | ratio | 43.2%          | 20.3%            | 22.2%          | 14.3%            |                                |
| YRO | area  | 83072.5        | 36823.6          | 63298.4        | 21949.9          | 0.76                           |
|     | ratio | 40.5%          | 17.9%            | 30.9%          | 10.7%            |                                |

**Table S4.** ICP analysis of Ru<sup>3+</sup> for HRO and YRO after stability test.

| Sample               | YRO  | HRO  |
|----------------------|------|------|
| Concentration (mg/L) | 1.05 | 0.91 |

**Table S5.** The O vacancy formation energy (Bader charge analysis)

|     | E <sub>Ovacancy</sub> /eV | <sup>a</sup> d-band center/eV | <sup>b</sup> d-band center/eV | Band gap/eV | Magnetic moment/ $\mu$ |
|-----|---------------------------|-------------------------------|-------------------------------|-------------|------------------------|
| YRO | 1.58                      | -3.33                         | -4.37                         | 0.648       | 1.682                  |
| HRO | 4.18                      | -3.35                         | -4.42                         | 0.645       | 1.684                  |

\*Bandgap and magnetic moments on Ru in bulk YRO and HRO.

<sup>a</sup> Bulk, <sup>b</sup> Surface of YRO and HRO



**Table S6.** Comparison of OER performance for pyrochlore oxides in acidic media.

| Electrocatalyst                                                       | Supporter        | Electrolyte                          | Overpotential<br>(mV) @ 10<br>mA/cm <sup>2</sup> | Tafel slope<br>(mV/dec) | Stability                        | Reference |
|-----------------------------------------------------------------------|------------------|--------------------------------------|--------------------------------------------------|-------------------------|----------------------------------|-----------|
|                                                                       | GCE <sup>1</sup> |                                      | 280                                              | 36.86                   | 60 h @ 1 mA cm <sup>-2</sup>     | This work |
| Ho <sub>2</sub> Ru <sub>2</sub> O <sub>7</sub>                        | TFP <sup>2</sup> | 0.1 M HClO <sub>4</sub>              | 215                                              | ----                    | 10 h @ 10 mA<br>cm <sup>-2</sup> |           |
| Y <sub>2</sub> Ru <sub>2</sub> O <sub>7</sub>                         | GCE              | 0.1 M HClO <sub>4</sub>              | 312                                              | 42.91                   | 2 h @ 10 mA cm <sup>-2</sup>     | This work |
| Y <sub>1.85</sub> Zn <sub>0.15</sub> Ru <sub>2</sub> O <sub>7-δ</sub> | AB <sup>3</sup>  | 0.5 M H <sub>2</sub> SO <sub>4</sub> | 291                                              | 36.90                   | 8 h @ 1 mA cm <sup>-2</sup>      | [3]       |
| Nd <sub>2</sub> Ru <sub>2</sub> O <sub>7</sub>                        | GCE              | 0.1 M HClO <sub>4</sub>              | 310                                              | 58.48                   | 8 h @ 1 A F <sup>-1</sup>        | [4]       |
| Sm <sub>2</sub> Ru <sub>2</sub> O <sub>7</sub>                        | GCE              | 0.1 M HClO <sub>4</sub>              | 345                                              | 58.98                   | ----                             | [4]       |
| Pr <sub>2</sub> Ir <sub>2</sub> O <sub>7</sub>                        | GCE              | 0.1 M HClO <sub>4</sub>              | 295                                              | ----                    | 3 h @ 10 mA cm <sup>-2</sup>     | [5]       |
| Y <sub>1.85</sub> Ba <sub>0.15</sub> Ru <sub>2</sub> O <sub>7</sub>   | GCE              | 0.5 M H <sub>2</sub> SO <sub>4</sub> | 287                                              | 40.80                   | 5 h @ 10 mA cm <sup>-2</sup>     | [6]       |
| Y <sub>2</sub> [Ru <sub>1.6</sub> Y <sub>0.4</sub> ]O <sub>7-δ</sub>  | GCE              | 0.1 M HClO <sub>4</sub>              | 245                                              | 37.00                   | ----                             | [7]       |
| Nd <sub>2</sub> Ru <sub>2</sub> O <sub>7</sub>                        | GCE              | 0.1 M HClO <sub>4</sub>              | 342                                              | 41.00                   | 1 h @ 10 mA cm <sup>-2</sup>     | [8]       |
| Gd <sub>2</sub> Ru <sub>2</sub> O <sub>7</sub>                        | GCE              | 0.1 M HClO <sub>4</sub>              | 349                                              | 47.00                   | 1 h @ 10 mA cm <sup>-2</sup>     | [8]       |
| Y <sub>1.7</sub> Sr <sub>0.3</sub> Ru <sub>2</sub> O <sub>7</sub>     | GCE              | 0.5 M H <sub>2</sub> SO <sub>4</sub> | 264                                              | 44.8                    | 28 h @ 10 mA<br>cm <sup>-2</sup> | [9]       |
| Y <sub>2</sub> Ru <sub>2</sub> O <sub>7-δ</sub>                       | GCE              | 0.1 M HClO <sub>4</sub>              | 300 mV @ 5<br>mA/cm <sup>2</sup>                 | 46                      | 8 h @ 1 mA<br>cm <sup>-2</sup>   | [10]      |

<sup>1</sup>GCE = glass carbon electrode, <sup>2</sup>TFP = Ti fiber paper, <sup>3</sup>AB = Acetylene black.

## Reference

- [1] K. Li, and D. Xue, *J. Phys. Chem. A*, 2006, **110**, 11332-11337.
- [2] R. D. Shannon, *Acta Cryst.*, 1976, **A32**, 751.
- [3] Q. Feng, Q. Wang, Z. Zhang, Y. Xiong, H. Li, Y. Yao, X.-Z. Yuan, M. C. Williams, M. Gu, H. Chen, H. Li, H. Wang, *Appl. Catal. B* 2019, **244**, 494.
- [4] H. Liu, Z. Wang, M. Li, X. Zhao, X. Duan, S. Wang, G. Tan, Y. Kuang, X. Sun, *Sci. China Mater.* 2021, **64**, 1653.
- [5] C. Shang, C. Cao, D. Yu, Y. Yan, Y. Lin, H. Li, T. Zheng, X. Yan, W. Yu, S. Zhou, J. Zeng, *Adv. Mater.* 2019, **31**, e1805104.
- [6] Q. Feng, J. Zou, Y. Wang, Z. Zhao, M. C. Williams, H. Li, H. Wang, *ACS Appl. Mater. Interfaces* 2020, **12**, 4520.
- [7] J. Kim, P. C. Shih, Y. Qin, Z. Al-Bardan, C. J. Sun, H. Yang, *Angew. Chem. Int. Ed. Engl.* 2018, **57**, 13877.
- [8] M. A. Hubert, A. M. Patel, A. Gallo, Y. Liu, E. Valle, M. Ben-Naim, J. Sanchez, D. Sokaras, R. Sinclair, J. K. Nørskov, L. A. King, M. Bajdich, T. F. Jaramillo, *ACS Catal.* 2020, **10**, 12182.
- [9] N. Zhang, C. Wang, J. Chen, C. Hu, J. Ma, X. Deng, B. Qiu, L. Cai, Y. Xiong, Y. Chai, *ACS Nano* 2021, **15**, 8537.
- [10] J. Kim, P. C. Shih, K. C. Tsao, Y. T. Pan, X. Yin, C. J. Sun, H. Yang, *J. Am. Chem. Soc.* 2017, **139**, 12076.
